# Supplementary material for: Which men change in intimate partner violence prevention interventions? A trajectory analysis in Rwanda and South Africa
Source: PubMed Central journal article supplement — BMJ Glob Health. 2020 May 17;5(5):e002199. doi: 10.1136/bmjgh-2019-002199 (PMC7239517; doi:10.1136/bmjgh-2019-002199), 2020-05-17
Supplement: bmjgh-2019-002199supp001.pdf [file bmjgh-2019-002199supp001.pdf]

**Supplementary Table 1: Mean physical and/or sexual IPV scores for each trajectory, by study**

|                                               | Trajectory | Baseline<br>mean (95%CI) | Midline<br>mean (95%CI) | Endline<br>mean (95%CI) |
|-----------------------------------------------|------------|--------------------------|-------------------------|-------------------------|
| Stepping<br>Stones and<br>Creating<br>Futures | Low        | 0.90(0.61, 1.18)         | 0.87(0.57, 1.17)        | 0.46(0.31, 0.61)        |
|                                               | High-low   | 8.10(6.67, 9.53)         | 3.84(2.52, 5.15)        | 0.16(0.04, 0.28)        |
|                                               | High-high  | 5.21(3.92, 6.49)         | 3.74(2.48, 5.00)        | 8.52(7.24, 9.79)        |
| CHANGE                                        | Low        | 0.32(0.27, 0.38)         | 0.36(0.24, 0.49)        | 0.28(0.21, 0.35)        |
|                                               | High-low   | 6.93(6.29, 7.57)         | 1.77(1.15, 2.39)        | 0.29(0.19, 0.39)        |
|                                               | High-high  | 5.03(4.09, 5.96)         | 8.50(7.07, 9.93)        | 7.70(6.70, 8.71)        |
| Indashyikirwa                                 | Low        | 0.13(0.10, 0.16)         | 0.16(0.12, 0.19)        | 0.20(0.14, 0.25)        |
|                                               | High-low   | 3.46(3.14, 3.78)         | 0.86(0.68, 1.04)        | 0.29(0.21, 0.38)        |
|                                               | High-high  | 2.47(1.91, 3.02)         | 3.20(2.24, 4.16)        | 4.60(3.79, 5.41)        |
